# Supplementary material for: Phylogenetic relationships of the New World titi monkeys (Callicebus): first appraisal of taxonomy based on molecular evidence
Source: PubMed Central journal article supplement (PMC4774130; doi:10.1186/s12983-016-0142-4), 2016-03-01

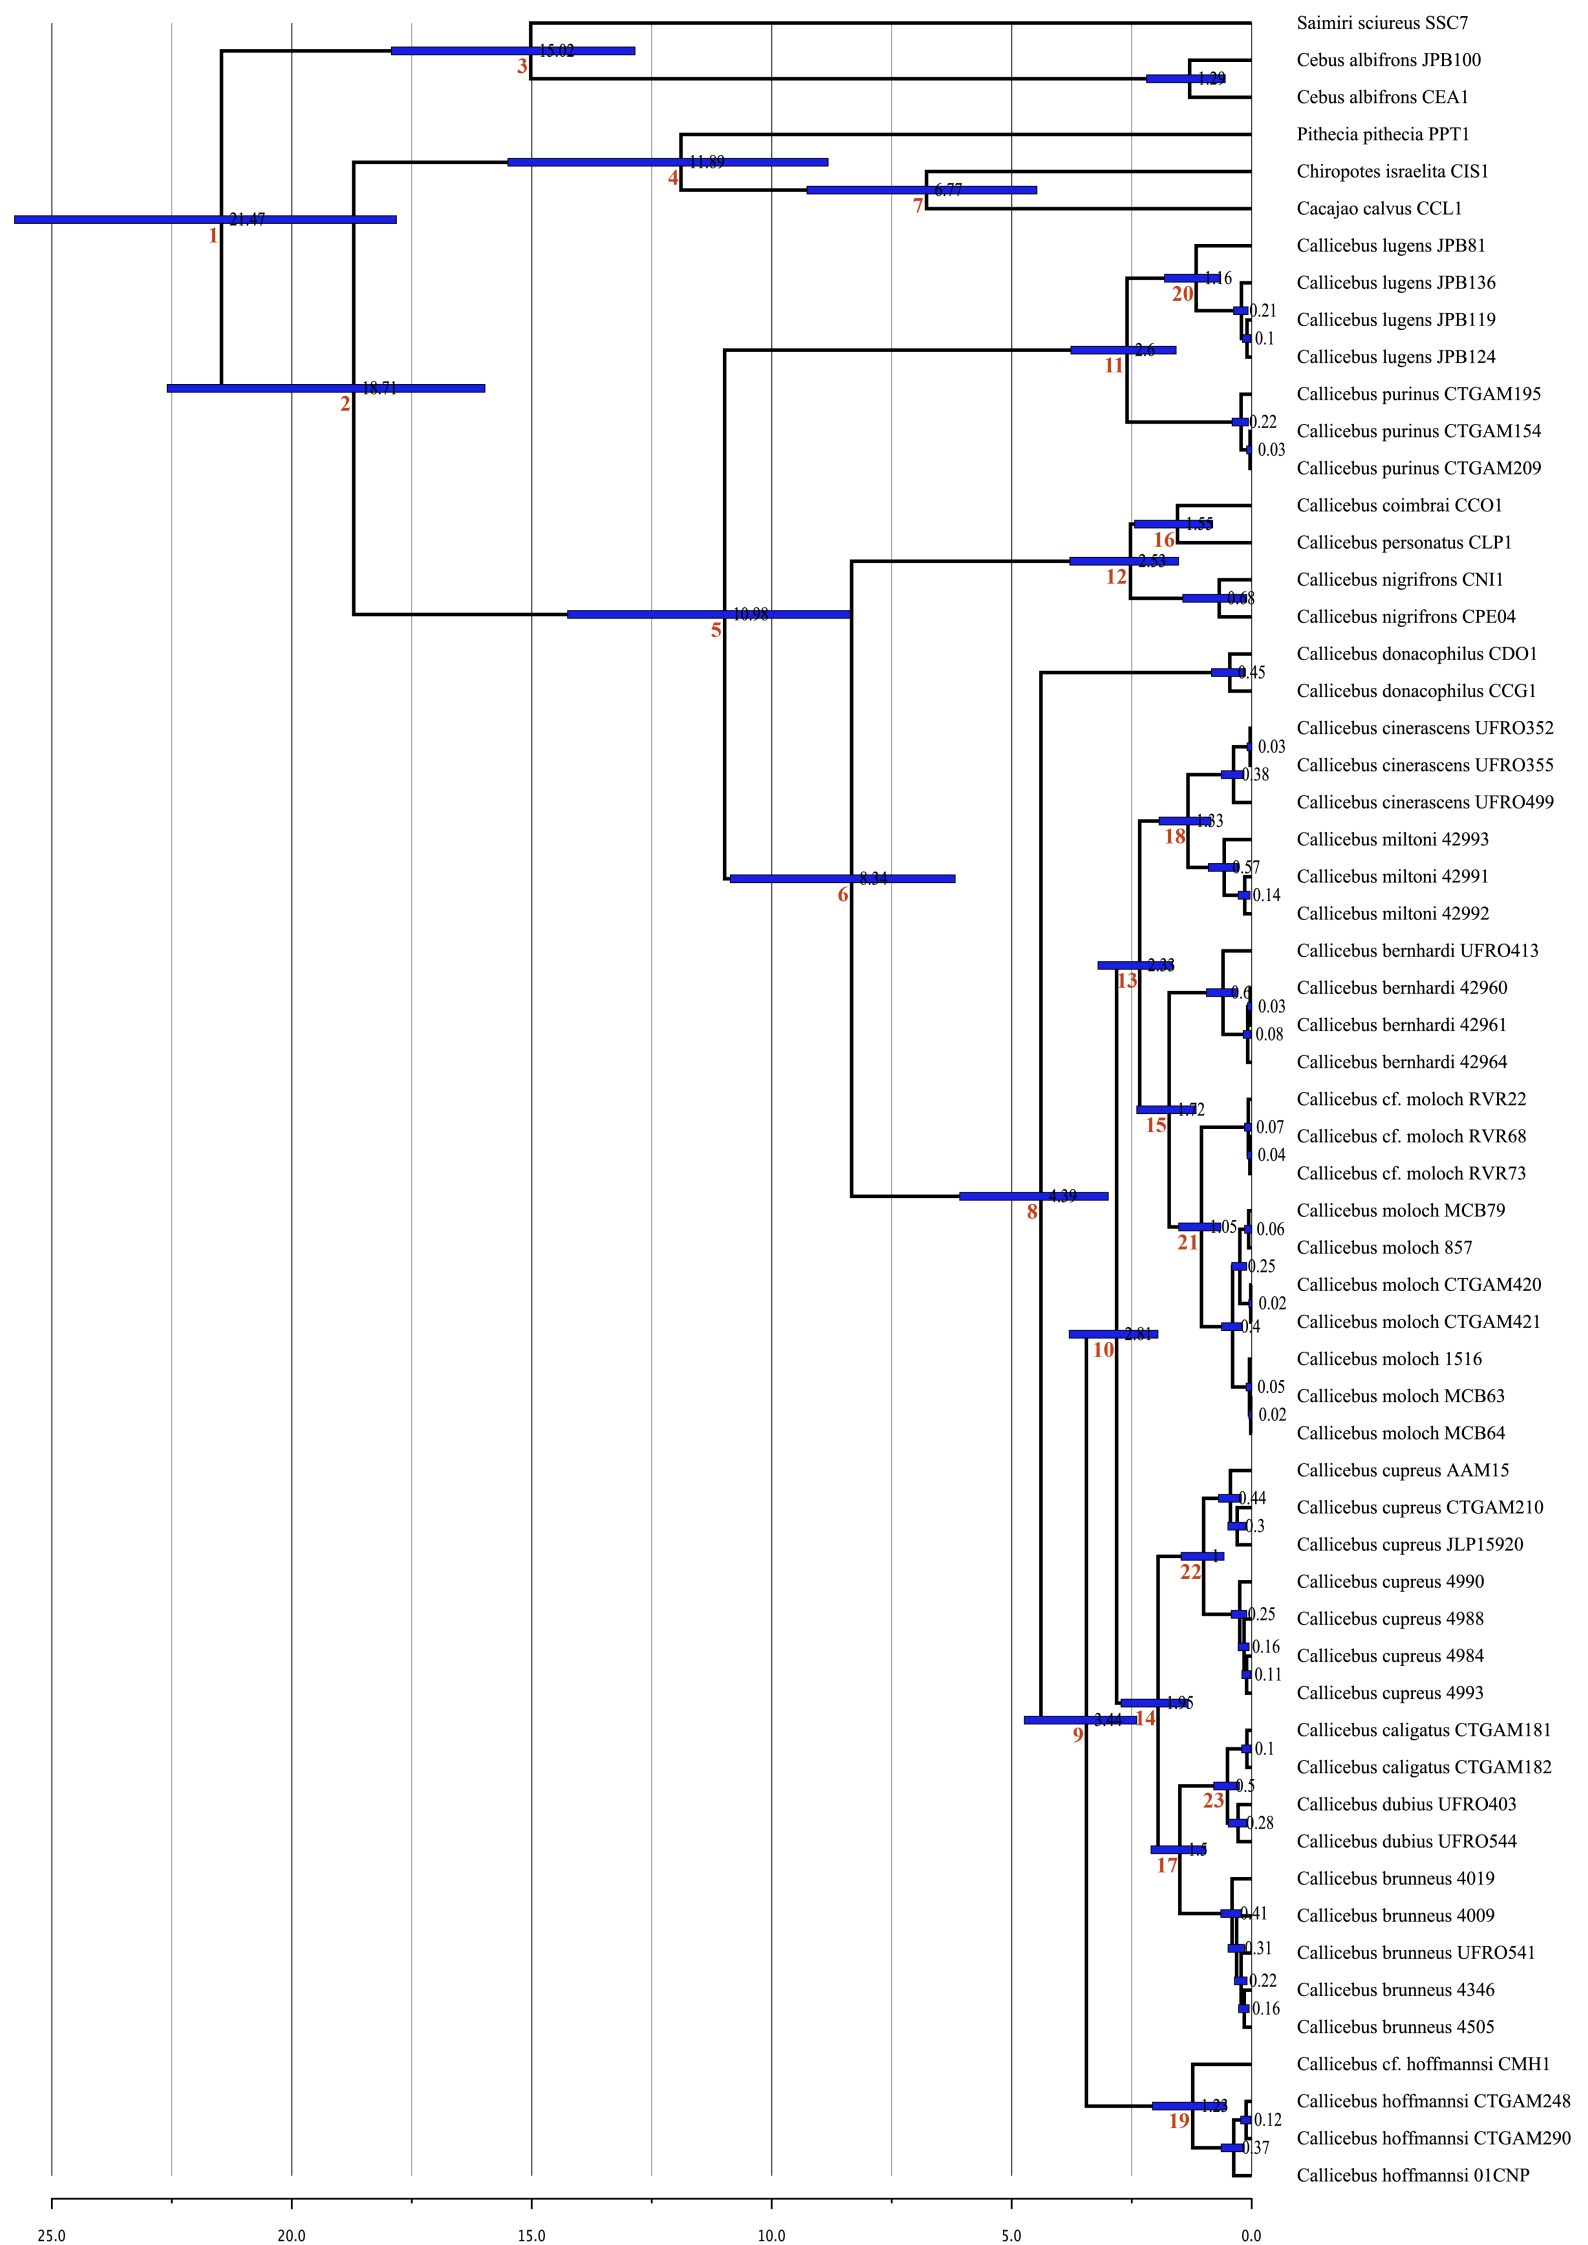

Supplement: 12983_2016_142_MOESM6_ESM.pdf [file 12983_2016_142_MOESM6_ESM.pdf]
